# Supplementary material for: Synthesis, crystal structures, and luminescent properties of Cd(ii) coordination polymers assembled from asymmetric semi-rigid V-shaped multicarboxylate ligands
Source: Royal Society of Chemistry journal article supplement (doi:10.1039/c0ce00098a), 2010-09-07
Supplement: c0ce00098a.pdf [file c0ce00098a.pdf]

## Supporting Information

### **Synthesis, Crystal Structures, and Luminescent Properties of Cd(II) Coordination Polymers Assembled from Asymmetric Semi-rigid V-Shaped Multicarboxylate Ligands**

Hailong Wang,<sup>†,‡</sup> Kang Wang,<sup>†</sup> Daofeng Sun,<sup>‡</sup> Zhong-Hai Ni,<sup>\*,‡</sup> and Jianzhuang  
Jiang<sup>\*,†,‡</sup>

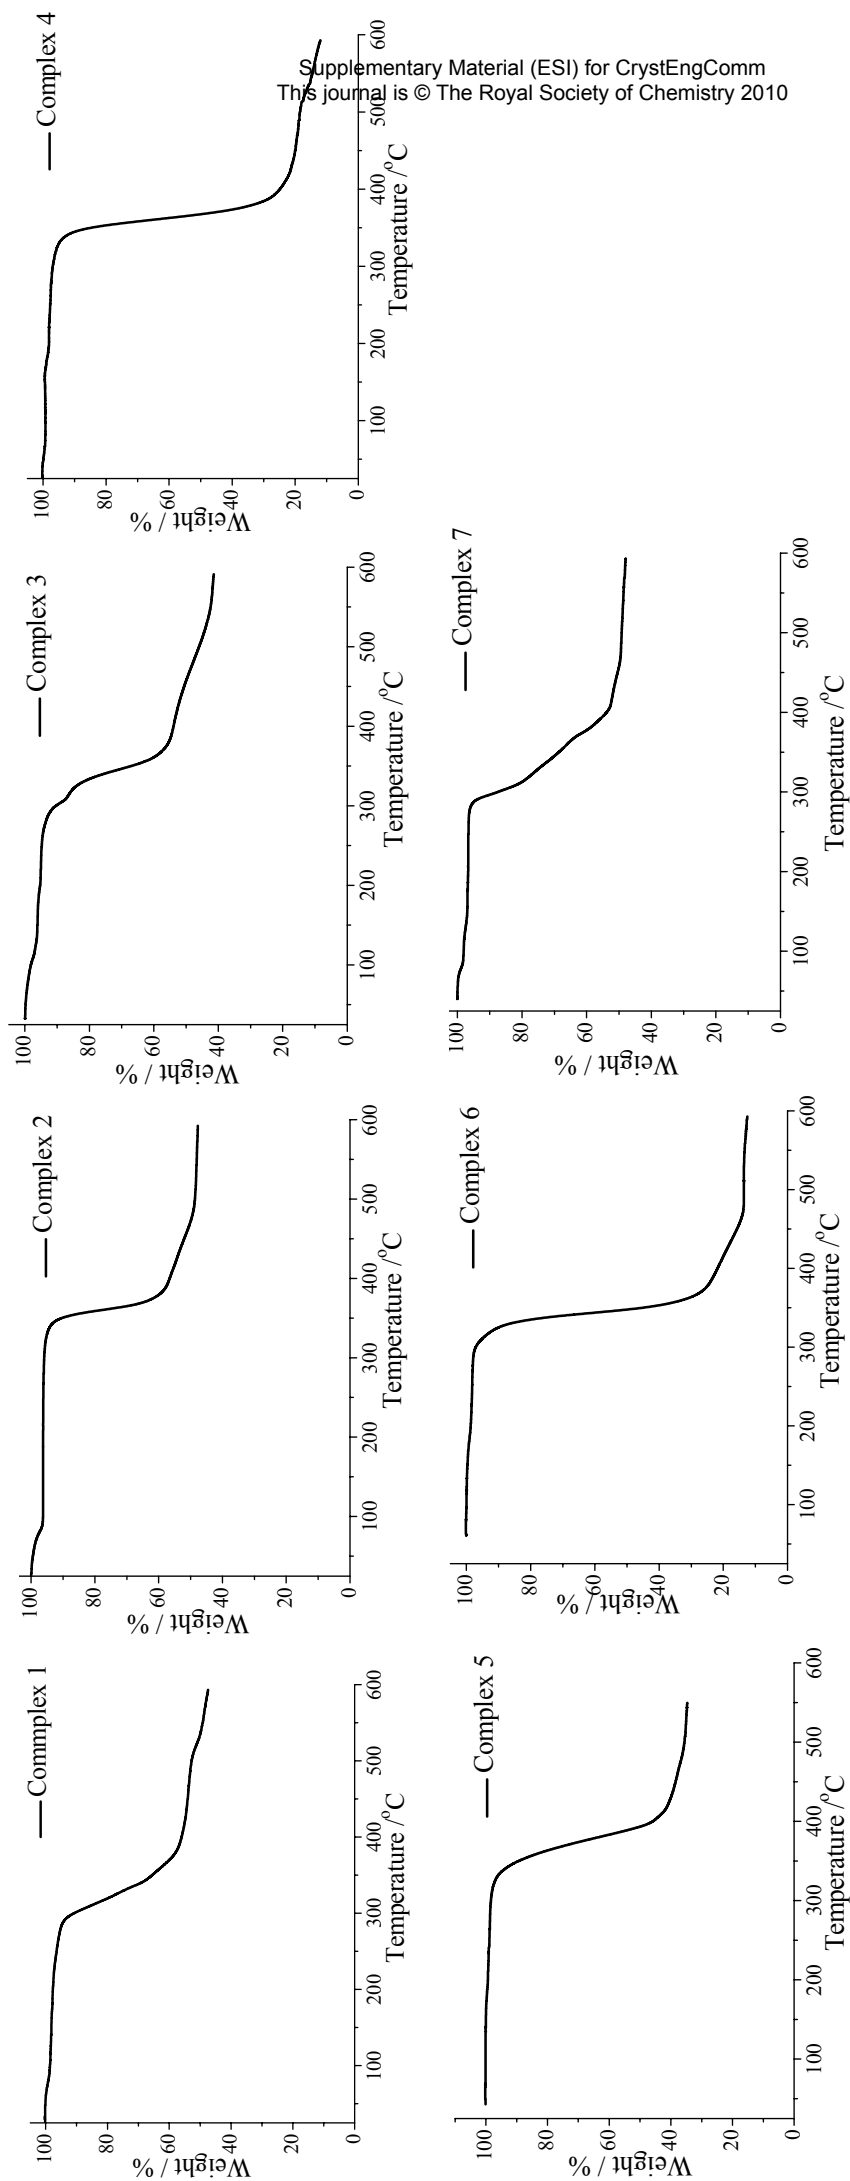

**Figure S1.** The TGA curves of complex 1-7 in the range of 30-600 °C.

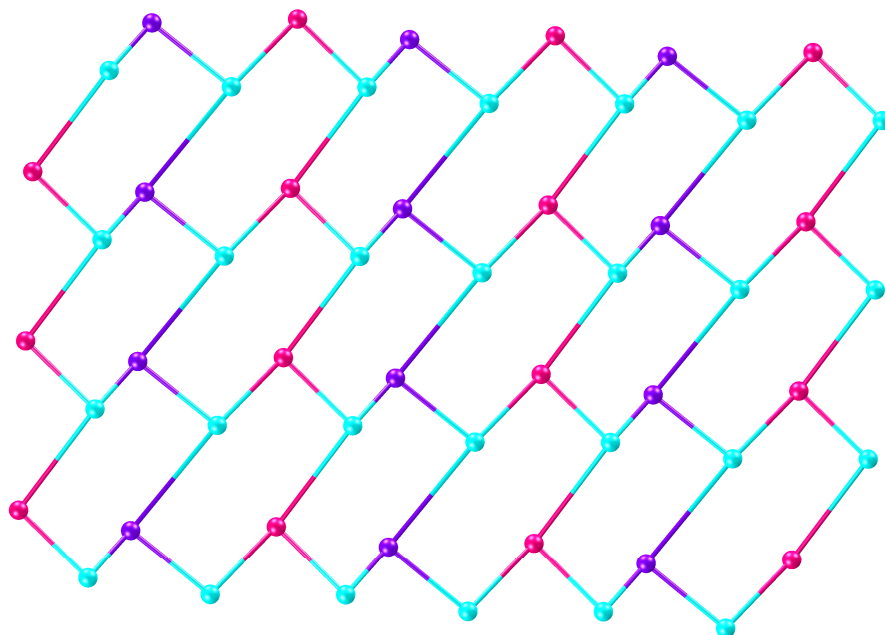

**Figure S2.** Topology structure of **2**.

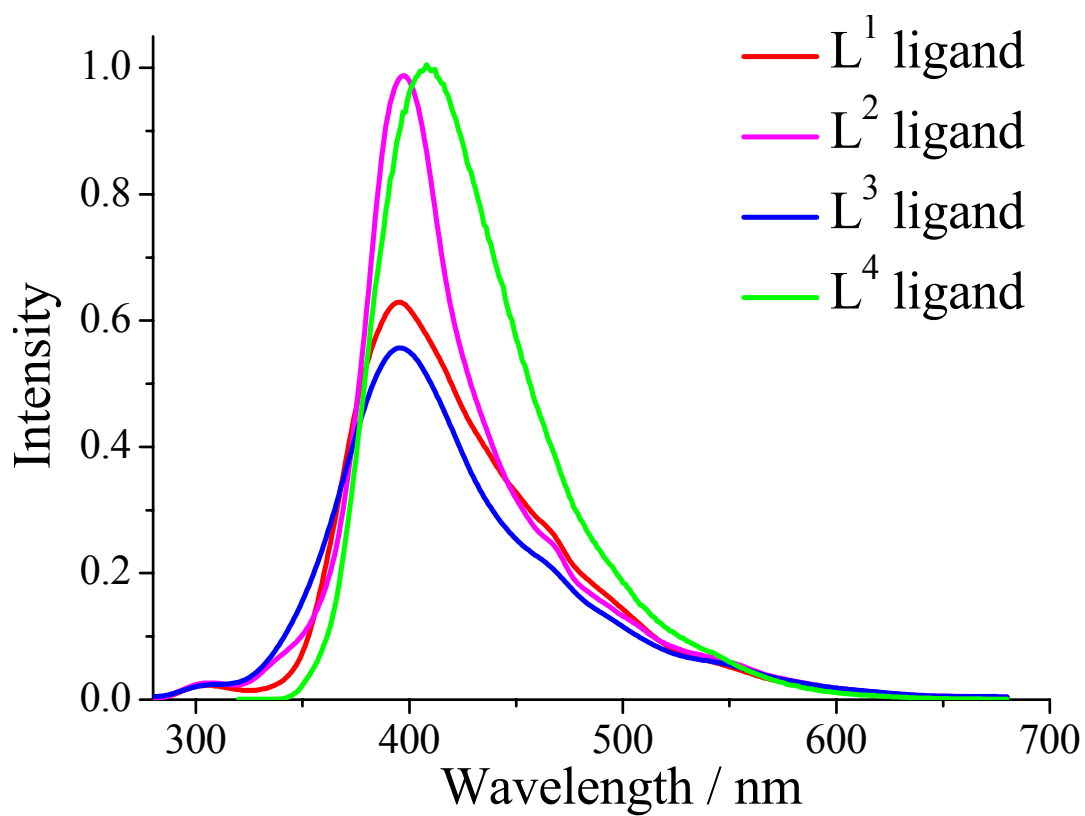

**Figure S3.** Luminescence emission band of free ligands H<sub>3</sub>L<sup>1</sup>-H<sub>3</sub>L<sup>4</sup>.

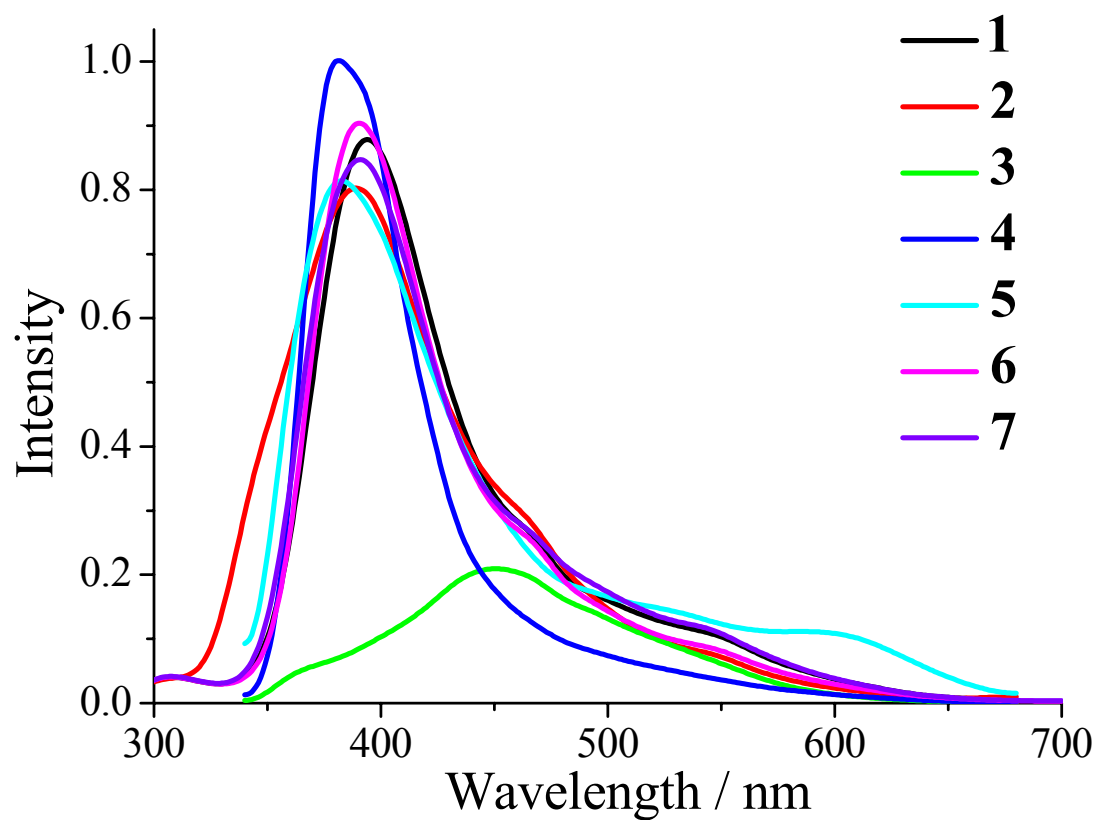

**Figure S4.** Luminescence emission band of complexes 1-7.

**Table S1.** Selected bond distances (Å) and bond angles (°).

| <b>Complex 1</b>    |            |                     |            |
|---------------------|------------|---------------------|------------|
| N(1)-Cd(1)          | 2.342(6)   | N(2)-Cd(1)          | 2.386(5)   |
| N(3)-Cd(2)          | 2.327(5)   | O(2)-Cd(1)          | 2.197(5)   |
| O(4)-Cd(1)#2        | 2.466(6)   | O(5)-Cd(2)          | 2.347(4)   |
| O(5)-Cd(1)#2        | 2.403(5)   | O(6)-Cd(2)          | 2.216(5)   |
| O(7)-Cd(1)#3        | 2.289(4)   | Cd(1)-O(5)#2        | 2.403(5)   |
| Cd(1)-O(7)#4        | 2.289(4)   | Cd(1)-O(4)#2        | 2.466(6)   |
| Cd(2)-O(5)#1        | 2.347(4)   | Cd(2)-O(6)#1        | 2.216(5)   |
| Cd(2)-N(3)#1        | 2.327(5)   |                     |            |
| O(2)-Cd(1)-O(7)#4   | 104.92(19) | O(2)-Cd(1)-N(1)     | 151.6(2)   |
| O(7)#4-Cd(1)-N(1)   | 84.22(19)  | O(2)-Cd(1)-N(2)     | 86.1(2)    |
| O(7)#4-Cd(1)-N(2)   | 136.65(19) | N(1)-Cd(1)-N(2)     | 69.8(2)    |
| O(2)-Cd(1)-O(5)#2   | 106.3(2)   | O(7)#4-Cd(1)-O(5)#2 | 86.30(17)  |
| N(1)-Cd(1)-O(5)#2   | 101.1(2)   | N(2)-Cd(1)-O(5)#2   | 131.42(17) |
| O(2)-Cd(1)-O(4)#2   | 104.6(3)   | O(7)#4-Cd(1)-O(4)#2 | 134.34(19) |
| N(1)-Cd(1)-O(4)#2   | 86.1(2)    | N(2)-Cd(1)-O(4)#2   | 79.26(18)  |
| O(5)#2-Cd(1)-O(4)#2 | 52.22(16)  | O(6)#1-Cd(2)-O(6)   | 154.2(2)   |
| O(6)#1-Cd(2)-N(3)#1 | 88.22(17)  | O(6)-Cd(2)-N(3)#1   | 112.99(19) |
| O(6)#1-Cd(2)-N(3)   | 112.99(19) | O(6)-Cd(2)-N(3)     | 88.22(17)  |
| N(3)#1-Cd(2)-N(3)   | 72.7(2)    | O(6)#1-Cd(2)-O(5)#1 | 80.54(16)  |
| O(6)-Cd(2)-O(5)#1   | 81.85(17)  | N(3)#1-Cd(2)-O(5)#1 | 162.06(18) |
| N(3)-Cd(2)-O(5)#1   | 98.85(18)  | O(6)#1-Cd(2)-O(5)   | 81.85(17)  |
| O(6)-Cd(2)-O(5)     | 80.54(16)  | N(3)#1-Cd(2)-O(5)   | 98.85(18)  |
| N(3)-Cd(2)-O(5)     | 162.06(18) | O(5)#1-Cd(2)-O(5)   | 93.4(3)    |
| <b>Complex 2</b>    |            |                     |            |
| N(1)-Cd(1)          | 2.349(6)   | N(2)-Cd(1)          | 2.294(5)   |
| N(3)-Cd(2)          | 2.316(7)   | N(4)-Cd(2)          | 2.297(6)   |
| N(6)-Cd(3)          | 2.365(5)   | N(5)-Cd(3)          | 2.334(5)   |
| O(4)-Cd(3)          | 2.229(4)   | O(1)-Cd(1)          | 2.254(5)   |
| O(7)-Cd(2)          | 2.433(5)   | O(6)-Cd(2)          | 2.276(5)   |
| O(10)-Cd(2)#1       | 2.249(4)   | O(8)-Cd(3)          | 2.242(5)   |
| O(11)-Cd(1)#2       | 2.510(5)   | O(10)-Cd(1)#2       | 2.392(4)   |
| O(14)-Cd(3)#3       | 2.501(7)   | O(13)-Cd(3)#3       | 2.520(6)   |
| O(16)-Cd(2)         | 2.271(5)   | O(15)-Cd(1)         | 2.282(5)   |
| Cd(1)-O(11)#4       | 2.510(5)   | Cd(1)-O(10)#4       | 2.392(4)   |
| Cd(3)-O(14)#6       | 2.501(7)   | Cd(2)-O(10)#5       | 2.249(4)   |
| Cd(3)-O(13)#6       | 2.520(6)   |                     |            |
| O(1)-Cd(1)-O(15)    | 90.4(2)    | O(1)-Cd(1)-N(2)     | 113.3(2)   |
| O(15)-Cd(1)-N(2)    | 128.55(19) | O(1)-Cd(1)-N(1)     | 174.2(2)   |

|                       |            |                     |            |
|-----------------------|------------|---------------------|------------|
| O(15)-Cd(1)-N(1)      | 83.8(2)    | N(2)-Cd(1)-N(1)     | 70.9(2)    |
| O(1)-Cd(1)-O(10)#4    | 83.67(17)  | O(15)-Cd(1)-O(10)#4 | 93.05(17)  |
| N(2)-Cd(1)-O(10)#4    | 132.67(17) | N(1)-Cd(1)-O(10)#4  | 96.33(17)  |
| O(1)-Cd(1)-O(11)#4    | 78.28(18)  | O(15)-Cd(1)-O(11)#4 | 144.93(17) |
| N(2)-Cd(1)-O(11)#4    | 86.08(17)  | N(1)-Cd(1)-O(11)#4  | 106.40(18) |
| O(10)#4-Cd(1)-O(11)#4 | 53.08(15)  | O(10)#5-Cd(2)-O(16) | 81.53(17)  |
| O(10)#5-Cd(2)-O(6)    | 91.22(17)  | O(16)-Cd(2)-O(6)    | 105.0(2)   |
| O(10)#5-Cd(2)-N(4)    | 120.1(2)   | O(16)-Cd(2)-N(4)    | 95.7(2)    |
| O(6)-Cd(2)-N(4)       | 144.8(2)   | O(10)#5-Cd(2)-N(3)  | 91.2(2)    |
| O(16)-Cd(2)-N(3)      | 160.4(2)   | O(6)-Cd(2)-N(3)     | 93.3(3)    |
| N(4)-Cd(2)-N(3)       | 72.1(3)    | O(10)#5-Cd(2)-O(7)  | 145.44(15) |
| O(16)-Cd(2)-O(7)      | 106.9(2)   | O(6)-Cd(2)-O(7)     | 54.26(17)  |
| N(4)-Cd(2)-O(7)       | 92.8(2)    | N(3)-Cd(2)-O(7)     | 89.4(2)    |
| O(4)-Cd(3)-O(8)       | 89.58(18)  | O(4)-Cd(3)-N(5)     | 115.9(2)   |
| O(8)-Cd(3)-N(5)       | 153.07(18) | O(4)-Cd(3)-N(6)     | 111.89(18) |
| O(8)-Cd(3)-N(6)       | 93.7(2)    | N(5)-Cd(3)-N(6)     | 69.67(19)  |
| O(4)-Cd(3)-O(14)#6    | 73.59(19)  | O(8)-Cd(3)-O(14)#6  | 112.0(2)   |
| N(5)-Cd(3)-O(14)#6    | 85.0(2)    | N(6)-Cd(3)-O(14)#6  | 154.0(2)   |
| O(4)-Cd(3)-O(13)#6    | 118.7(2)   | O(8)-Cd(3)-O(13)#6  | 90.4(2)    |
| N(5)-Cd(3)-O(13)#6    | 84.9(2)    | N(6)-Cd(3)-O(13)#6  | 129.3(2)   |
| O(14)#6-Cd(3)-O(13)#6 | 50.2(2)    |                     |            |

### Complex 3

|                     |            |                     |            |
|---------------------|------------|---------------------|------------|
| N(1)-Cd(2)          | 2.2994(19) | N(2)-Cd(2)          | 2.326(2)   |
| O(1)-Cd(1)          | 2.2195(17) | O(1)-Cd(2)#4        | 2.4086(17) |
| O(3)-Cd(2)#4        | 2.2767(19) | O(4)-Cd(2)          | 2.2685(19) |
| O(6)-Cd(2)#5        | 2.3746(18) | O(6)-Cd(1)#1        | 2.5095(19) |
| Cd(1)-O(1)#6        | 2.2195(17) | O(7)-Cd(1)#1        | 2.2928(19) |
| Cd(1)-O(7)#8        | 2.293(2)   | Cd(1)-O(7)#7        | 2.2928(19) |
| Cd(1)-O(6)#7        | 2.5095(19) | Cd(1)-O(6)#8        | 2.5095(19) |
| Cd(1)-C(15)#8       | 2.738(3)   | Cd(2)-O(3)#4        | 2.2767(19) |
| Cd(2)-O(6)#5        | 2.3746(18) | Cd(2)-O(1)#4        | 2.4086(17) |
| O(1)#6-Cd(1)-O(7)#7 | 93.72(7)   | O(1)-Cd(1)-O(7)#8   | 93.72(7)   |
| O(1)#6-Cd(1)-O(7)#8 | 108.49(6)  | O(7)#7-Cd(1)-O(7)#8 | 143.22(11) |
| O(1)-Cd(1)-O(6)#8   | 75.45(6)   | O(1)#6-Cd(1)-O(6)#8 | 162.54(6)  |
| O(7)#7-Cd(1)-O(6)#8 | 102.57(7)  | O(7)#8-Cd(1)-O(6)#8 | 54.28(6)   |
| O(1)-Cd(1)-O(6)#7   | 162.54(6)  | O(1)#6-Cd(1)-O(6)#7 | 75.45(6)   |
| O(7)#7-Cd(1)-O(6)#7 | 54.28(6)   | O(7)#8-Cd(1)-O(6)#7 | 102.57(7)  |
| O(6)#8-Cd(1)-O(6)#7 | 109.08(8)  | O(4)-Cd(2)-O(3)#4   | 109.55(7)  |
| O(4)-Cd(2)-N(1)     | 95.45(7)   | O(3)#4-Cd(2)-N(1)   | 97.28(7)   |
| O(4)-Cd(2)-N(2)     | 83.89(7)   | O(3)#4-Cd(2)-N(2)   | 88.13(7)   |
| N(1)-Cd(2)-N(2)     | 174.44(8)  | O(4)-Cd(2)-O(6)#5   | 96.70(7)   |
| O(3)#4-Cd(2)-O(6)#5 | 148.94(7)  | N(1)-Cd(2)-O(6)#5   | 96.42(7)   |

|                     |          |                     |           |
|---------------------|----------|---------------------|-----------|
| N(2)-Cd(2)-O(6)#5   | 78.20(7) | O(4)-Cd(2)-O(1)#4   | 171.15(6) |
| O(3)#4-Cd(2)-O(1)#4 | 78.10(7) | N(1)-Cd(2)-O(1)#4   | 87.78(7)  |
| N(2)-Cd(2)-O(1)#4   | 92.10(7) | O(6)#5-Cd(2)-O(1)#4 | 74.72(6)  |

#### Complex 4

|                     |            |                      |            |
|---------------------|------------|----------------------|------------|
| Cd(1)-O(6)#1        | 2.244(3)   | Cd(1)-N(2)           | 2.288(3)   |
| Cd(1)-O(3)          | 2.310(3)   | Cd(1)-O(9)           | 2.317(3)   |
| Cd(1)-N(1)          | 2.318(3)   | Cd(1)-O(8)           | 2.595(3)   |
| Cd(1)-O(4)          | 2.610(3)   | Cd(2)-O(7)#1         | 2.220(3)   |
| Cd(2)-O(13)#2       | 2.232(3)   | Cd(2)-O(3)           | 2.316(3)   |
| Cd(2)-O(9)          | 2.318(3)   | Cd(2)-O(10)          | 2.321(3)   |
| Cd(2)-O(2)          | 2.360(3)   | Cd(3)-N(3)           | 2.299(3)   |
| Cd(3)-O(14)#2       | 2.288(3)   | Cd(3)-N(4)           | 2.345(4)   |
| Cd(3)-O(10)         | 2.344(3)   | Cd(3)-O(1)           | 2.460(3)   |
| Cd(3)-O(2)          | 2.354(3)   | O(13)-Cd(2)#2        | 2.232(3)   |
| O(14)-Cd(3)#2       | 2.288(3)   |                      |            |
| O(6)#1-Cd(1)-N(2)   | 90.44(11)  | O(6)#1-Cd(1)-O(3)    | 78.43(12)  |
| N(2)-Cd(1)-O(3)     | 127.15(11) | O(6)#1-Cd(1)-O(9)    | 91.12(11)  |
| N(2)-Cd(1)-O(9)     | 150.06(11) | O(3)-Cd(1)-O(9)      | 82.36(9)   |
| O(6)#1-Cd(1)-N(1)   | 146.74(13) | N(2)-Cd(1)-N(1)      | 72.60(12)  |
| O(3)-Cd(1)-N(1)     | 134.61(11) | O(9)-Cd(1)-N(1)      | 90.35(11)  |
| O(6)#1-Cd(1)-O(8)   | 76.26(15)  | N(2)-Cd(1)-O(8)      | 98.68(11)  |
| O(3)-Cd(1)-O(8)     | 127.17(11) | O(9)-Cd(1)-O(8)      | 52.91(10)  |
| N(1)-Cd(1)-O(8)     | 78.29(13)  | O(6)#1-Cd(1)-O(4)    | 127.85(13) |
| N(2)-Cd(1)-O(4)     | 104.34(11) | O(3)-Cd(1)-O(4)      | 52.62(9)   |
| O(9)-Cd(1)-O(4)     | 98.17(10)  | N(1)-Cd(1)-O(4)      | 84.70(11)  |
| O(8)-Cd(1)-O(4)     | 145.72(12) | O(7)#1-Cd(2)-O(13)#2 | 101.24(12) |
| O(7)#1-Cd(2)-O(3)   | 88.03(10)  | O(13)#2-Cd(2)-O(3)   | 117.41(10) |
| O(7)#1-Cd(2)-O(9)   | 87.98(11)  | O(13)#2-Cd(2)-O(9)   | 158.25(10) |
| O(3)-Cd(2)-O(9)     | 82.23(10)  | O(7)#1-Cd(2)-O(10)   | 114.55(11) |
| O(13)#2-Cd(2)-O(10) | 81.44(10)  | O(3)-Cd(2)-O(10)     | 148.19(10) |
| O(9)-Cd(2)-O(10)    | 76.81(10)  | O(7)#1-Cd(2)-O(2)    | 163.10(11) |
| O(13)#2-Cd(2)-O(2)  | 86.87(11)  | O(3)-Cd(2)-O(2)      | 75.07(9)   |
| O(9)-Cd(2)-O(2)     | 89.69(10)  | O(10)-Cd(2)-O(2)     | 81.12(10)  |
| O(14)#2-Cd(3)-N(3)  | 89.94(12)  | O(14)#2-Cd(3)-O(10)  | 81.00(10)  |
| N(3)-Cd(3)-O(10)    | 91.68(11)  | O(14)#2-Cd(3)-N(4)   | 140.50(12) |
| N(3)-Cd(3)-N(4)     | 71.68(12)  | O(10)-Cd(3)-N(4)     | 132.49(11) |
| O(14)#2-Cd(3)-O(2)  | 100.45(10) | N(3)-Cd(3)-O(2)      | 165.95(11) |
| O(10)-Cd(3)-O(2)    | 80.76(9)   | N(4)-Cd(3)-O(2)      | 104.80(11) |
| O(14)#2-Cd(3)-O(1)  | 83.88(12)  | N(3)-Cd(3)-O(1)      | 137.18(11) |
| O(10)-Cd(3)-O(1)    | 128.63(10) | N(4)-Cd(3)-O(1)      | 86.71(12)  |
| O(2)-Cd(3)-O(1)     | 54.33(10)  |                      |            |



### Complex 5

|                      |            |                    |           |
|----------------------|------------|--------------------|-----------|
| N(1)-Cd(1)           | 2.317(2)   | N(2)-Cd(1)         | 2.295(3)  |
| N(3)-Cd(3)           | 2.286(3)   | N(4)-Cd(3)         | 2.307(3)  |
| O(1)-Cd(1)           | 2.575(3)   | O(2)-Cd(2)         | 2.322(2)  |
| O(2)-Cd(1)           | 2.337(2)   | O(3)-Cd(3)         | 2.280(2)  |
| O(3)-Cd(2)           | 2.295(2)   | O(6)-Cd(3)#1       | 2.256(2)  |
| O(7)-Cd(2)#1         | 2.236(2)   | O(8)-Cd(1)         | 2.304(2)  |
| O(8)-Cd(2)           | 2.349(2)   | O(10)-Cd(2)        | 2.327(2)  |
| O(10)-Cd(3)          | 2.4294(19) | O(11)-Cd(3)        | 2.448(2)  |
| O(13)-Cd(2)#2        | 2.200(2)   | O(14)-Cd(1)#2      | 2.289(2)  |
| Cd(1)-O(14)#2        | 2.289(2)   | Cd(2)-O(7)#1       | 2.236(2)  |
| Cd(2)-O(13)#2        | 2.200(2)   | Cd(3)-O(6)#1       | 2.256(2)  |
| O(14)#2-Cd(1)-N(2)   | 145.38(9)  | O(14)#2-Cd(1)-O(8) | 82.12(9)  |
| N(2)-Cd(1)-O(8)      | 131.43(8)  | O(14)#2-Cd(1)-N(1) | 84.52(8)  |
| N(2)-Cd(1)-N(1)      | 71.28(9)   | O(8)-Cd(1)-N(1)    | 120.81(8) |
| O(14)#2-Cd(1)-O(2)   | 89.25(8)   | N(2)-Cd(1)-O(2)    | 102.35(8) |
| O(8)-Cd(1)-O(2)      | 81.80(7)   | N(1)-Cd(1)-O(2)    | 155.22(8) |
| O(14)#2-Cd(1)-O(1)   | 76.68(11)  | N(2)-Cd(1)-O(1)    | 84.69(10) |
| O(8)-Cd(1)-O(1)      | 129.16(7)  | N(1)-Cd(1)-O(1)    | 102.59(8) |
| O(2)-Cd(1)-O(1)      | 52.64(7)   | O(13)#2-Cd(2)-O(3) | 110.93(8) |
| O(13)#2-Cd(2)-O(7)#1 | 100.36(9)  | O(13)#2-Cd(2)-O(2) | 88.37(8)  |
| O(7)#1-Cd(2)-O(3)    | 81.60(8)   | O(3)-Cd(2)-O(2)    | 78.89(7)  |
| O(7)#1-Cd(2)-O(2)    | 160.40(8)  | O(7)#1-Cd(2)-O(10) | 86.81(8)  |
| O(13)#2-Cd(2)-O(10)  | 165.96(7)  | O(2)-Cd(2)-O(10)   | 88.65(7)  |
| O(3)-Cd(2)-O(10)     | 81.91(7)   | O(7)#1-Cd(2)-O(8)  | 116.22(8) |
| O(13)#2-Cd(2)-O(8)   | 88.84(8)   | O(2)-Cd(2)-O(8)    | 81.17(7)  |
| O(3)-Cd(2)-O(8)      | 151.28(8)  | O(6)#1-Cd(3)-O(3)  | 83.28(8)  |
| O(10)-Cd(2)-O(8)     | 77.14(7)   | O(3)-Cd(3)-N(3)    | 133.26(9) |
| O(6)#1-Cd(3)-N(3)    | 138.87(8)  | O(3)-Cd(3)-N(4)    | 93.33(8)  |
| O(6)#1-Cd(3)-N(4)    | 91.30(9)   | O(6)#1-Cd(3)-O(10) | 102.57(7) |
| N(3)-Cd(3)-N(4)      | 71.55(10)  | N(3)-Cd(3)-O(10)   | 102.18(8) |
| O(3)-Cd(3)-O(10)     | 80.00(7)   | O(6)#1-Cd(3)-O(11) | 83.50(8)  |
| N(4)-Cd(3)-O(10)     | 163.68(8)  | N(3)-Cd(3)-O(11)   | 85.53(9)  |
| N(4)-Cd(3)-O(11)     | 138.25(8)  | O(3)-Cd(3)-O(11)   | 126.79(7) |

### Complex 6

|              |          |              |          |
|--------------|----------|--------------|----------|
| N(1)-Cd(1)   | 2.320(4) | N(2)-Cd(1)   | 2.368(4) |
| N(3)-Cd(2)   | 2.302(4) | N(4)-Cd(2)   | 2.298(4) |
| O(1)-Cd(1)   | 2.421(4) | O(2)-Cd(3)#1 | 2.320(3) |
| O(2)-Cd(1)   | 2.521(3) | O(3)-Cd(2)   | 2.294(3) |
| O(6)-Cd(3)#2 | 2.199(3) | O(7)-Cd(2)#1 | 2.281(3) |
| O(8)-Cd(1)   | 2.579(4) | O(9)-Cd(1)   | 2.312(3) |
| O(9)-Cd(3)#1 | 2.417(3) | O(10)-Cd(2)  | 2.245(3) |

|                      |            |                     |            |
|----------------------|------------|---------------------|------------|
| O(10)-Cd(3)#1        | 2.322(3)   | O(13)-Cd(3)         | 2.466(4)   |
| O(14)-Cd(3)          | 2.305(4)   | O(15)-Cd(1)         | 2.297(4)   |
| Cd(2)-O(7)#3         | 2.281(3)   | Cd(3)-O(6)#4        | 2.199(3)   |
| Cd(3)-O(2)#3         | 2.320(3)   | Cd(3)-O(10)#3       | 2.322(3)   |
| Cd(3)-O(9)#3         | 2.417(3)   |                     |            |
| O(15)-Cd(1)-O(9)     | 83.43(13)  | O(15)-Cd(1)-N(1)    | 151.76(14) |
| O(9)-Cd(1)-N(1)      | 120.93(12) | O(15)-Cd(1)-N(2)    | 80.51(14)  |
| O(9)-Cd(1)-N(2)      | 148.15(12) | N(1)-Cd(1)-N(2)     | 71.25(12)  |
| O(15)-Cd(1)-O(1)     | 86.36(17)  | O(9)-Cd(1)-O(1)     | 105.64(12) |
| N(1)-Cd(1)-O(1)      | 99.00(13)  | N(2)-Cd(1)-O(1)     | 100.60(12) |
| O(15)-Cd(1)-O(2)     | 120.98(15) | O(9)-Cd(1)-O(2)     | 72.13(10)  |
| N(1)-Cd(1)-O(2)      | 82.79(12)  | N(2)-Cd(1)-O(2)     | 139.52(12) |
| O(1)-Cd(1)-O(2)      | 52.65(10)  | O(15)-Cd(1)-O(8)    | 95.59(17)  |
| O(9)-Cd(1)-O(8)      | 53.19(11)  | N(1)-Cd(1)-O(8)     | 89.59(13)  |
| N(2)-Cd(1)-O(8)      | 101.25(12) | O(1)-Cd(1)-O(8)     | 158.08(11) |
| O(2)-Cd(1)-O(8)      | 109.26(11) | O(10)-Cd(2)-O(7)#3  | 84.06(13)  |
| O(10)-Cd(2)-O(3)     | 84.04(12)  | O(7)#3-Cd(2)-O(3)   | 86.61(13)  |
| O(10)-Cd(2)-N(4)     | 114.06(13) | O(7)#3-Cd(2)-N(4)   | 89.81(13)  |
| O(3)-Cd(2)-N(4)      | 161.10(13) | O(10)-Cd(2)-N(3)    | 127.60(13) |
| O(7)#3-Cd(2)-N(3)    | 147.69(14) | O(3)-Cd(2)-N(3)     | 101.44(13) |
| N(4)-Cd(2)-N(3)      | 72.45(13)  | O(6)#4-Cd(3)-O(14)  | 128.98(13) |
| O(6)#4-Cd(3)-O(2)#3  | 101.22(12) | O(14)-Cd(3)-O(2)#3  | 78.43(12)  |
| O(6)#4-Cd(3)-O(10)#3 | 94.36(12)  | O(14)-Cd(3)-O(10)#3 | 121.84(12) |
| O(2)#3-Cd(3)-O(10)#3 | 135.36(11) | O(6)#4-Cd(3)-O(9)#3 | 152.33(12) |
| O(14)-Cd(3)-O(9)#3   | 77.53(12)  | O(2)#3-Cd(3)-O(9)#3 | 73.94(11)  |
| O(10)#3-Cd(3)-O(9)#3 | 73.11(11)  | O(6)#4-Cd(3)-O(13)  | 94.81(13)  |
| O(14)-Cd(3)-O(13)    | 54.29(12)  | O(2)#3-Cd(3)-O(13)  | 128.53(11) |
| O(10)#3-Cd(3)-O(13)  | 90.82(12)  | O(9)#3-Cd(3)-O(13)  | 109.62(13) |
| <b>Complex 7</b>     |            |                     |            |
| N(1)-Cd(2)           | 2.345(6)   | N(2)-Cd(2)          | 2.310(5)   |
| N(3)-Cd(1)           | 2.296(5)   | N(4)-Cd(1)          | 2.446(5)   |
| N(5)-Cd(3)           | 2.336(6)   | N(6)-Cd(3)          | 2.340(6)   |
| O(1)-Cd(1)#1         | 2.263(5)   | O(2)-Cd(2)#1        | 2.251(4)   |
| O(3)-Cd(1)#2         | 2.245(5)   | O(6)-Cd(2)          | 2.323(4)   |
| O(7)-Cd(2)           | 2.407(5)   | O(8)-Cd(1)          | 2.380(4)   |
| O(9)-Cd(1)           | 2.451(5)   | O(11)-Cd(3)         | 2.210(5)   |
| O(14)-Cd(3)#3        | 2.226(5)   | O(15)-Cd(2)         | 2.310(5)   |
| O(16)-Cd(3)          | 2.319(6)   | Cd(1)-O(3)#2        | 2.245(5)   |
| Cd(1)-O(1)#4         | 2.263(5)   | Cd(2)-O(2)#4        | 2.251(4)   |
| Cd(3)-O(14)#5        | 2.226(5)   |                     |            |
| O(3)#2-Cd(1)-O(1)#4  | 86.13(17)  | O(3)#2-Cd(1)-N(3)   | 97.83(19)  |

|                     |            |                    |            |
|---------------------|------------|--------------------|------------|
| O(1)#4-Cd(1)-N(3)   | 120.9(2)   | O(3)#2-Cd(1)-O(8)  | 101.16(16) |
| O(1)#4-Cd(1)-O(8)   | 92.87(18)  | N(3)-Cd(1)-O(8)    | 142.23(19) |
| O(3)#2-Cd(1)-N(4)   | 85.19(17)  | O(1)#4-Cd(1)-N(4)  | 166.49(18) |
| N(3)-Cd(1)-N(4)     | 70.7(2)    | O(8)-Cd(1)-N(4)    | 78.71(18)  |
| O(3)#2-Cd(1)-O(9)   | 153.44(16) | O(1)#4-Cd(1)-O(9)  | 101.32(18) |
| N(3)-Cd(1)-O(9)     | 99.93(18)  | O(8)-Cd(1)-O(9)    | 53.43(15)  |
| N(4)-Cd(1)-O(9)     | 82.25(17)  | O(2)#4-Cd(2)-O(15) | 82.87(16)  |
| O(2)#4-Cd(2)-N(2)   | 99.09(18)  | O(15)-Cd(2)-N(2)   | 89.78(18)  |
| O(2)#4-Cd(2)-O(6)   | 100.52(16) | O(15)-Cd(2)-O(6)   | 101.60(17) |
| N(2)-Cd(2)-O(6)     | 158.38(18) | O(2)#4-Cd(2)-N(1)  | 114.36(17) |
| O(15)-Cd(2)-N(1)    | 156.05(18) | N(2)-Cd(2)-N(1)    | 71.75(19)  |
| O(6)-Cd(2)-N(1)     | 91.79(18)  | O(2)#4-Cd(2)-O(7)  | 150.03(15) |
| O(15)-Cd(2)-O(7)    | 85.71(17)  | N(2)-Cd(2)-O(7)    | 108.51(18) |
| O(6)-Cd(2)-O(7)     | 54.97(16)  | N(1)-Cd(2)-O(7)    | 85.92(18)  |
| O(11)-Cd(3)-O(14)#5 | 142.1(2)   | O(11)-Cd(3)-O(16)  | 87.6(2)    |
| O(14)#5-Cd(3)-O(16) | 84.1(2)    | O(11)-Cd(3)-N(5)   | 122.3(2)   |
| O(14)#5-Cd(3)-N(5)  | 93.9(2)    | O(16)-Cd(3)-N(5)   | 86.1(2)    |
| O(11)-Cd(3)-N(6)    | 108.0(2)   | O(14)#5-Cd(3)-N(6) | 92.9(2)    |
| O(16)-Cd(3)-N(6)    | 156.8(2)   | N(5)-Cd(3)-N(6)    | 71.1(2)    |

**Symmetry codes for complexes 1-7:**

for complex **1**, #1  $-x+2, y, -z-1/2$ ; #2  $-x+2, -y+1, -z$ ; #3  $x, -y+1, z-1/2$ ; #4  $x, -y+1, z+1/2$ . for complex **2**, #1  $x-1, y+1, z$ ; #2  $x, y+1, z$ ; #3  $x+1, y, z$ ; #4  $x, y-1, z$ ; #5  $x+1, y-1, z$ ; #6  $x-1, y, z$ . for complex **3**, #1  $x, y+1, z$ ; #2  $x+1/2, y-1/2, z$ ; #3  $x-1/2, y+1/2, z$ ; #4  $-x, -y, -z$ ; #5  $-x, -y+1, -z$ ; #6  $-x, y, -z-1/2$ ; #7  $-x, y-1, -z-1/2$ ; #8  $x, y-1, z$ . for complex **4**, #1  $-x, -y+1, -z+1$ ; #2  $-x, -y+1, -z+2$ . for complex **5**, #1  $-x, -y+2, -z$ ; #2  $-x, -y+2, -z+1$ . for complex **6**, #1  $x+1/2, -y+1/2, z+1/2$ ; #2  $x+1, y, z+1$ ; #3  $x-1/2, -y+1/2, z-1/2$ ; #4  $x-1, y, z-1$ . for complex **7**, #1  $x-1, y, z$ ; #2  $-x-1, -y+1, -z+1$ ; #3  $x, y-1, z$ ; #4  $x+1, y, z$ ; #5  $x, y+1, z$ .
